# Supplementary material for: Exploring the role of interdisciplinarity in physics: Success, talent and luck
Source: PubMed Central journal article supplement (PMC6594681; doi:10.1371/journal.pone.0218793), 2019-06-26
Supplement: pone.0218793.s002.pdf [file pone.0218793.s002.pdf]

## APPENDIX 2: THE AGENT-BASED MODEL

Let us address, in this Appendix 2, some details about the agent-based model with which we were able to successfully replicate the stylized facts of the APS data set. The model was realized within NetLogo, a very powerful multi-agent programmable environment particularly suitable for the simulation of the dynamical behavior of complex systems [1].

### 2.1 Initial setup of the model

In Fig.S1 we show the NetLogo "world" as it appears at the beginning of a generic simulation. It is a squared metric space, with a size of  $201 \times 201$  patches, where the various agents live and move. Randomly distributed around the world are visible the two main categories of agents of our model:  $N$  researchers, with a person-like shape, and  $N_E$  PACS event-points, with a point-like shape. Both these agent's types are active elements of the environment, able to interact one among each other.

In the figure we represent only  $N = 500$  individuals for a better visualization, but in all the simulations we consider all the  $N = 7303$  active researchers, as in the APS data set. These researchers do not move during a simulation and are divided into the three groups  $L_1^{APS}$ ,  $L_2^{APS}$  and  $L_3^{APS}$  according with the real values of their interdisciplinary index  $I_i^{APS} = D_i^{APS} \times d_i^{APS}$ . Therefore, we will find  $N_1$  individuals in the group  $L_1^{APS}$  (in red),  $N_2$  in the group  $L_2^{APS}$  (in green) and  $N_3$  in the group  $L_3^{APS}$  (in blue). During a single simulation run, we will let these researchers to publish papers and collect citations with a periodicity of  $t = 1$  year and for a total time interval of  $t_{max} = 30$  years, in analogy with the real time period addressed in the APS data set. A first evident approximation of the model is the fact that we will keep the total number of active authors constant during the 30 years, while we know that their number do decrease, as shown in Fig.S2. This will imply an overestimation of the total number of published papers of several authors, but - as we have already stated - we are interested to capture the main stylized facts of the APS data set not the single details (which, of course, would be impossible to reproduce).

Each simulated author  $A_i$  is characterized not only by the variables  $I_i^{APS}$ ,  $D_i^{APS}$ ,  $\vec{D}_i^{APS}$  and  $d_i^{APS}$  ( $i = 1, \dots, N$ ), which are read from the APS data set, but also by other individual parameters shown in the left panel of Fig.S2 and described in the MP. In particular, to each researcher is assigned a fixed talent  $T_i \in [0, 1]$  (intelligence, skill, ...) randomly extracted at the beginning of each simulation run from a truncated Normal distribution with a mean

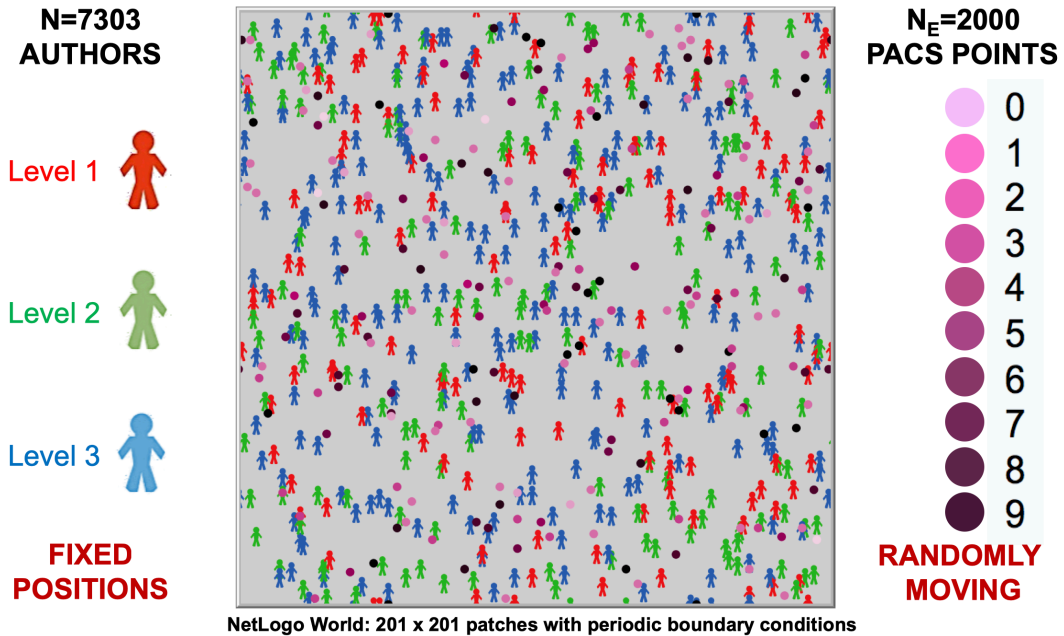

FIG. S1: An example of initial setup for our simulations.

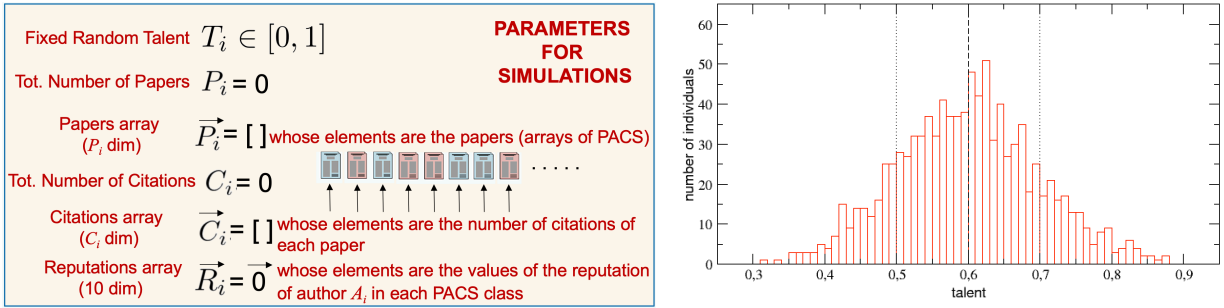

FIG. S2: (Left Panel) Individual parameters which characterize each single simulated author  $A_i$ . (Right Panel) Normal distribution of talent among the agents, with mean  $m_T = 0.6$  (indicated by a dashed vertical line) and standard deviation  $\sigma_T = 0.1$  (the values  $m_T \pm \sigma_T$  are indicated by two dotted vertical lines). This distribution does not change during a single simulation run.

$m_T = 0.6$  and a standard deviation  $\sigma_T = 0.1$  (see the right panel of Fig.S2). All the other individual parameters start from a null value at  $t = 0$  and increase in time during the simulation following opportune dynamical rules.

As we will show in the next subsection, other global parameters need to be introduced in the model and calibrated through the comparison with the real APS data.

31

## 2.2 Calibration of the model

The first global parameters that need to be calibrated concern the PACS event-points present in the NetLogo world. These points are colored with different shades of magenta (see Fig.S1), one for each of the 10 PACS classes, and randomly move around the world during a simulation run with a frequency much greater than the simulation time step, that in our model corresponds to 1 year (in particular, each point shifts of 2 patches towards a random direction 73 times during each time step  $t$  - i.e. with a frequency equivalent to 5 days).

As explained in the MP, in our model the PACS event-points represent opportunities, ideas, encounters, intuitions, serendipity events, etc., which can periodically, and randomly, occur to a given researcher along her career. The relative abundance of points belonging to each PACS class is fixed in agreement with the information of the APS data set and it can be appreciated in the histogram shown in the left panel of Fig.S3 (for example, it appears that the PACS code 70 is the most expressed, while the PACS code 90 is the less present). The total number  $N_E$  of these points is one of the global parameters that have to be calibrated.

The dynamical rules of the model, presented in detail in the MP, assume that the  $N$  researchers, during their careers, are exposed to events and ideas which could trigger research lines, with the consequent articles production, along one or more different disciplinary fields according with the PACS numbers associated to each of the  $N_E$  event-points. A given researcher  $A_i$ , depending on her interdisciplinary index  $I_i^{APS}$ , is sensitive only to the points corresponding to the numbers present in her PACS array  $\vec{D}_i^{APS}$ ; let us define these points as 'special' for that researcher. Every year  $t$ , a check is performed over all the researchers in order to verify what and how many event-points would fall inside their "sensitivity circles", which represent the extension of their sensitivity to the special points and therefore influence the publication dynamics. In the right panel of Fig.S3 is shown a zoom of the world, where three researchers, belonging to the three interdisciplinarity groups  $L_1^{APS}$ ,  $L_2^{APS}$  and  $L_3^{APS}$ , are reported together with their "sensitivity circles". The sizes of these circles are other three parameters that have to be calibrated through the comparison with real data.

In the left panel of Fig.S4 we show an example of the publication dynamics for the generic author  $A_i$ . Let us suppose that  $0 < D_i(t) \leq D_i^{APS}$  is the number of special PACS points randomly falling in the sensitivity circle of  $A_i$  at time  $t$ . In this example  $D_i^{APS} = 4$  but  $D_i(t) = 3$  since, among the four PACS numbers (1, 4, 6, 8) present in the array  $\vec{D}_i^{APS}$  (real data), only three (1, 4, 8) do fall inside the circle. We can therefore define a temporary array  $\vec{D}_i(t)$  containing these numbers. At this point, as explained in the MP, the considered researcher compares its talent  $T_i$  with a random real number  $r \in [0, 1]$ . Let us suppose that  $r < T_i$ : in this case the number  $P_i(t)$  of her published papers increases of an integer quantity  $\Delta P_i(t)$  randomly extracted from a Normal distribution with mean  $m_{P_i}(t-1) = \mu P_i(t-1)$  and standard deviation  $\sigma_{P_i}(t-1) = \gamma P_i(t-1)$ . The factors  $\mu$  and  $\gamma$  are other two global parameters (both  $\leq 1$ ) that have to be determined by the comparison with real data (notice that these parameters

61

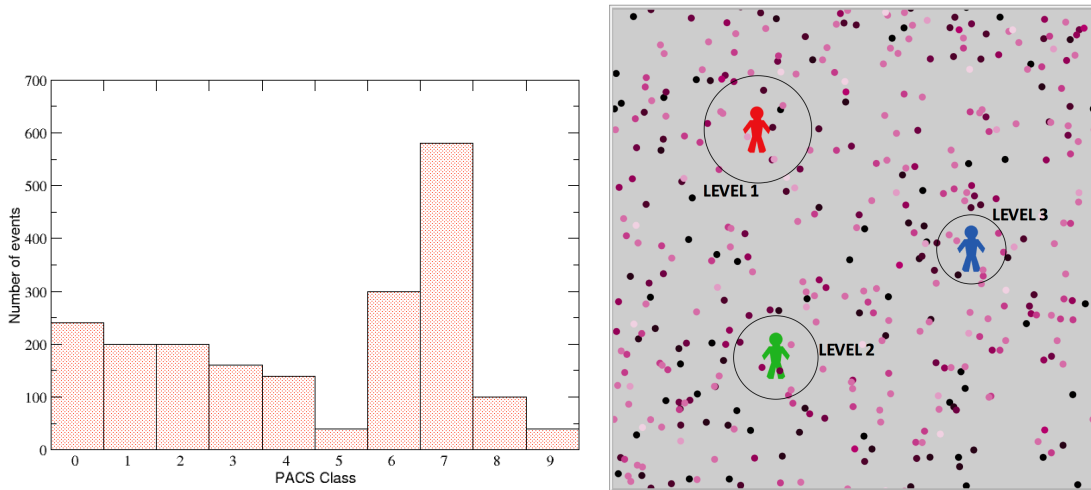

FIG. S3: Left panel: A histogram showing the number of event points for each PACS class, over a total of  $N_E = 2000$ , according to its relative percentage abundance in the APS dataset. Right panel: A zoom from Fig.S1, where only three researchers, each belonging to one of the three interdisciplinarity levels, are reported with their colors: red (level 1), green (level 2) and blue (level 3). Around them, some moving events are visible, represented as points of different colors selected from a magenta scale. Each color corresponds to a given PACS class of the APS data set, numbered from 0 (darkest) to 9 (brightest), as also shown in Fig.S1. The relative percentage of event points of each class is different and corresponds to the real one. Around each of the three researchers, the corresponding sensitivity circle is also visible, whose radius decreases by increasing the interdisciplinarity level (see text).

62 are fixed in time and are common to all the authors, while  $m_{P_i}(t-1)$  and  $\sigma_{P_i}(t-1)$  are different for each author  
63  $A_i$  and are also variable in time, since they do depend on her past production at time  $t-1$ . Finally, all the new  
64  $\Delta P_i$  publications will be characterized by the PACS numbers contained in the array  $\vec{D}_i(t)$ . In the example of Fig.S4  
65  $\Delta P_i = 3$ , thus three new papers will be added to the papers array  $\vec{P}_i(t-1)$  obtaining the new updated array  $\vec{P}_i(t)$   
66 where each of the new papers is characterized by the same three PACS numbers (1, 4, 8) – in practice, for each paper  
67 a copy of the array  $\vec{D}_i(t)$  is saved.

68 The rationale behind these rules is twofold. On one hand, each researcher  $A_i$  exploits the opportunities offered  
69 by the event-points falling in her sensitivity circle with a probability proportional to her talent, i.e. more talented  
70 authors have a greater a-priori probability of publishing new papers. On the other hand, the periodic increment in the  
71 number of publications is a constant fraction of the already published papers, i.e. the greater is the number  $P_i(t-1)$   
72 of existing publications at time  $(t-1)$ , the higher is the number  $\Delta P_i$  of new publications at time  $t$  (a sort of Matthew  
73 effect). Of course several approximations with respect to the reality have been assumed here. In particular, we assign  
74 the same PACS numbers to all the new papers published by  $A_i$  at time  $t$  and we do not consider coauthoring in the  
75 papers publication (each paper has a single author). This latter approximation contributes to produce an excess of  
76 published papers at the end of a simulation, but this is not a problem since we are interested in reproducing only the  
77 stylized fact represented by the shape of the papers distribution.

78 In order to choose the correct values for the global parameters previously introduced, i.e. the total number  $N_E$  of  
79 event-points, the radius of the sensitivity circles and the factors  $\mu$  and  $\gamma$ , we have run several simulation tests with  
80 different combinations of these parameters and compared the numerical results with the real APS data.

81 First, we considered the averages  $\langle d_i^{sim} \rangle_g$ , calculated over all the authors of the three groups ( $g = 1, 2, 3$ ),  
82 of the average number  $d_i^{sim}(t_{max})$  of different PACS simultaneously present in their publications at the end of the  
83 simulation (i.e. at  $t = t_{max}$ ) and compared them with the analogous real values  $\langle d_i^{APS} \rangle_g$  ( $g = 1, 2, 3$ ). It turned  
84 out that the values of  $\langle d_i^{sim} \rangle_g$  strictly depend on both the total number  $N_E$  of event-points and the radius of the  
85 sensitivity circles. The choice of  $N_E = 2000$  and of a radius of 6.5, 5.2 and 4.9 patches for the groups  $L_1, L_2$  and  $L_3$   
86 respectively, was able to produce the best agreement with the APS data, with an error of 1%, as shown in the right  
87 panel of Fig.S4. The decreasing size of the radius of the sensitivity circles for increasing interdisciplinarity levels, can  
88 be also justified by the evidence that the probability for a given researcher  $A_i$  to find special event-points inside her  
89 sensitivity circle increases with  $D_i^{APS}$ , and therefore with the interdisciplinarity index  $I_i^{APS}$ , thus if we adopted the  
90 same size of the circles for the three groups  $L_1, L_2$  and  $L_3$ , we would introduce a bias in favor of authors with medium

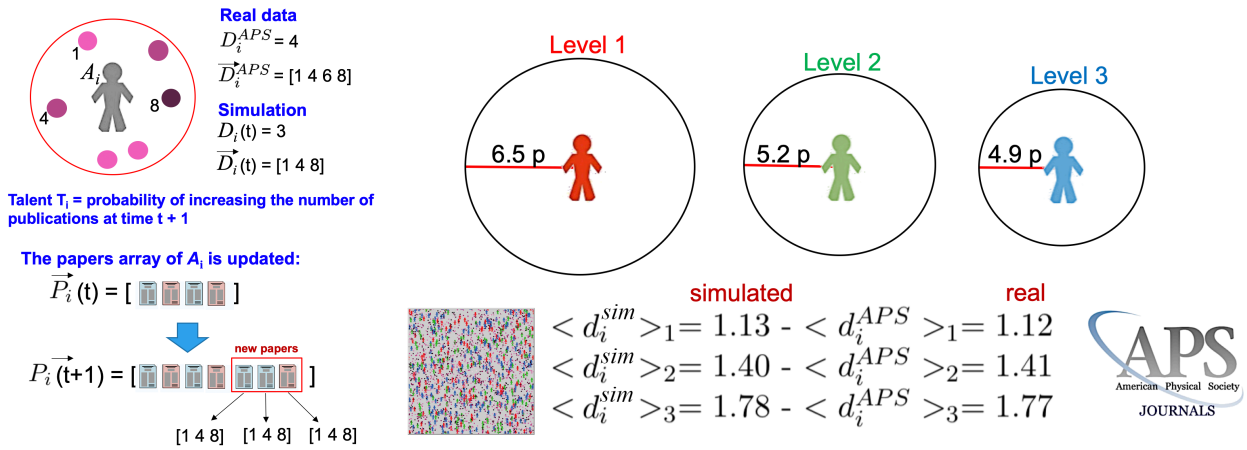

FIG. S4: (Left panel) An example of the dynamical rules for the publication of papers, see text. (Right panel) The total number  $N_E$  of event-points and the radius of the sensitivity circles for the three groups of authors can be chosen by looking at the agreement between the average values of the simulated  $d_i(t_{max})$  and the corresponding  $d_i^{APS}$  obtained from the APS data set, see text.

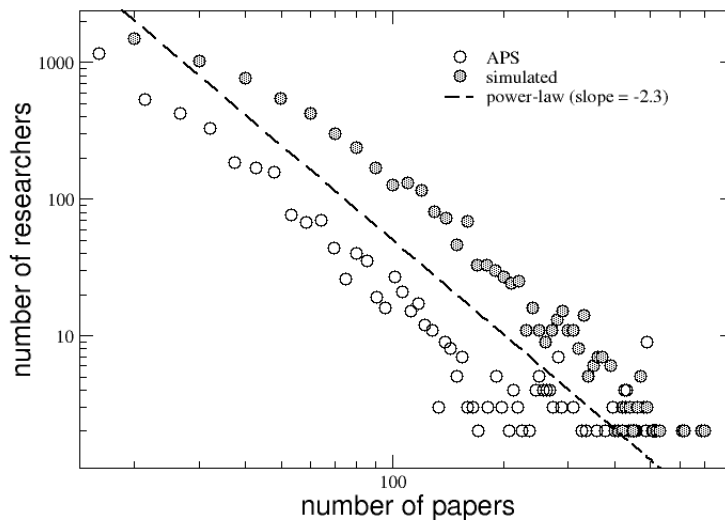

FIG. S5: Comparison between the papers distribution obtained from APS data set (open circles) and that obtained with the model simulation with  $N_E = 2000$ ,  $\mu = 1/5$  and  $\gamma = 1/4$  (full circles). The two distributions show a power-law behavior with the same exponent  $-2.3$ .

91 and in particular with high interdisciplinarity level.

92 Second, we were able to choose the correct values for the factors  $\mu$  and  $\gamma$  by comparing the simulated distribution  
 93 of all the published papers (without distinctions among the interdisciplinarity levels) with the real one extracted  
 94 from the APS data set. It turned out that the choice  $\mu = 1/5$  and  $\gamma = 1/4$  was able to produce a simulated papers  
 95 distribution with a power-law behavior with the same slope ( $-2.3$ ) of the real one (see Fig.S5). Notice that, due to  
 96 the constraints imposed by the calibration, these first results are very robust and do not depend on the details of the  
 97 initial conditions of the simulations (i.e. do not depend neither on the particular realization of the distribution of  
 98 talent among the agents, nor on the initial random position of both the agents and the event-points).

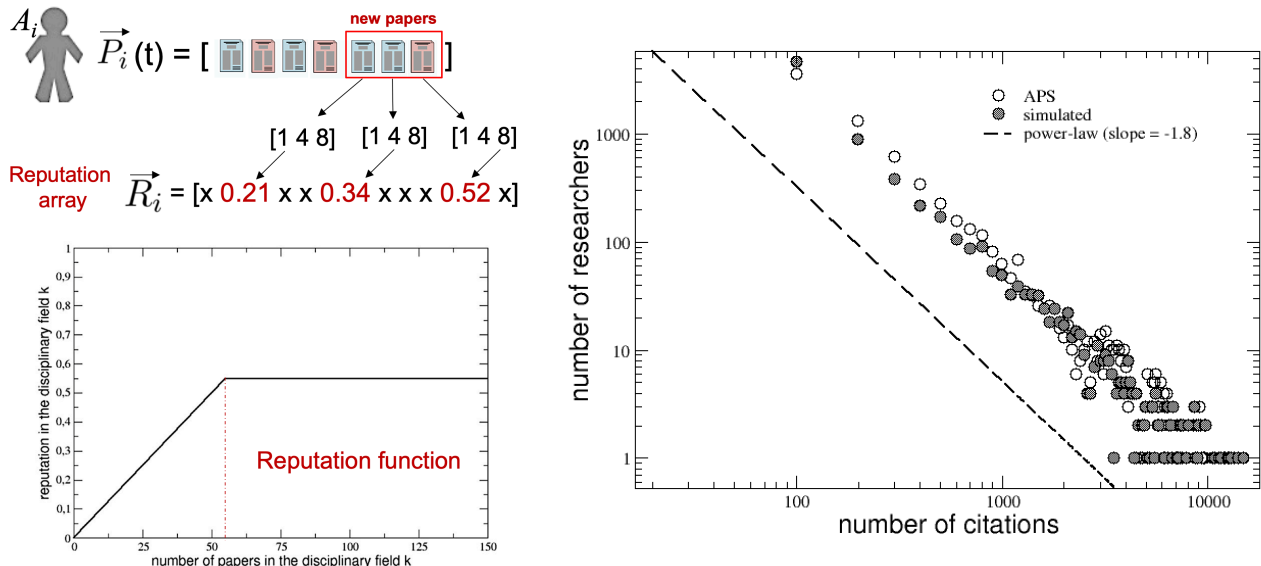

FIG. S6: (Left Panel) An example of the dynamical rules regulating the increase of reputation of an author  $A_i$  in the fields corresponding to the PACS present in each new publication, see text. (Right Panel) Comparison between the citations distribution obtained from APS data set (open circles) and that obtained with the model simulation with  $k = 0.01$  and  $y_{max} = 0.55$  (full circles). The two distributions show a power-law behavior with the same exponent  $-1.8$ .

99 Let us finally address the calibration of the citation dynamics for our model. As we have just seen, every year  $t$  all  
 100 the researchers have the chance to increase their number of publications. In correspondence of each new paper, author  
 101  $A_i$  also increases her own reputation in each of the disciplinary fields indicated by the PACS numbers associated to  
 102 that paper. As explained in the MP, each one of the 10 elements of the reputation array  $\vec{R}_i(t)$  is a real number,  
 103 included in the interval  $[0, 1]$ , representing the reputation level reached by the researcher  $A_i$  in the corresponding  
 104 disciplinary field at time  $t$  (see the top-left panel of Fig.S6 for an example).

105 A plausible approximation to account the behavior of the reputation level  $y$  of a generic author in a given field at  
 106 time  $t$  can be that of considering it as a semi-linear function of the number  $x$  of papers published in that field at time  
 107  $t$ . In other words, we assume that  $y$  does vary with  $x$  following the function

$$y = \begin{cases} k \cdot x & \text{for } x < x_{th} \\ y_{max} & \text{for } x \geq x_{th} \end{cases}$$

108 where  $k$  and  $y_{max}$  are global parameters that, again, have to be calibrated with the real data, while  $x_{th}$  is the  
 109 abscissa of the inflection point (that depends on  $y_{max}$ ).

110 Since, following the publication/citation dynamical rules explained in the MP, the total number of citations  $C_i(t+1)$   
 111 reached by the author  $A_i$  at time  $t + 1$  does depend on both her citation score  $C_i(t)$  and her reputation array  $\vec{R}_i(t)$   
 112 at time  $t$  (Matthew effect), the choice of  $k$  and  $y_{max}$  does influence the citations distribution obtained at the end of a  
 113 simulation (i.e. at  $t = t_{max}$ ). Through several simulation tests, where different combinations of these parameters were  
 114 adopted, we found that the values  $k = 0.01$  and  $y_{max} = 0.55$  (see bottom-left panel of Fig.S6) were able to produce  
 115 a simulated overall citations distribution (without distinctions among the interdisciplinarity levels) that overlaps the  
 116 analogous distribution obtained from the APS data set, following a power-law behavior with the same slope ( $-1.8$ , see  
 117 the right panel of Fig.S6). Again, the constraints imposed by the comparison with the real data make these simulation  
 118 results very robust, substantially independent from the initial conditions.

119 In conclusion, as last point to address, we also notice that - as observed in the MP - the calibrated agreement  
 120 between the simulated averages  $\langle d_i^{sim} \rangle_g$  and the analogous real ones  $\langle d_i^{APS} \rangle_g$  for the three interdisciplinarity  
 121 groups ( $g = 1, 2, 3$ ) do not ensure, of course, the correspondence of the individual  $d_i^{sim}(t_{max})$  ( $i = 1, \dots, N$ ) of each  
 122 agent-author at the end of a simulation with her initially assigned  $d_i^{APS}$ . Being the  $D_i^{APS}$  fixed for all the authors

123 during the simulation, this also implies that their initial value of the (real) individual interdisciplinarity index  $I_i^{APS}$   
 124 can be different with respect to the corresponding one  $I_i^{sim}(t_{max}) = D_i^{APS} \times d_i^{sim}(t_{max})$  obtained at the end of the  
 125 simulation. As a consequence, after a given simulation run, all the authors have to be reassigned – on the basis of the  
 126 same rules described in paragraph 1.1 – to the three interdisciplinarity groups before calculating the corresponding  
 127 papers and citations distributions (as those showed in the MP). We call these new groups  $L_1^{sim}$ ,  $L_2^{sim}$  and  $L_3^{sim}$ . It  
 128 results that the number of authors belonging to  $L_1^{sim}$ ,  $L_2^{sim}$  and  $L_3^{sim}$  is not exactly the same of the number of authors  
 129 belonging to the original groups  $L_1^{APS}$ ,  $L_2^{APS}$  and  $L_3^{APS}$ , but typically the differences between the old and the new  
 130 groups do not exceed 10%. In the simulation results presented in the MP, the sizes of the three new groups were,  
 131 respectively,  $N_1 = 2591$ ,  $N_2 = 2383$  and  $N_3 = 2329$ . With respect to the original sizes shown in Table S1 of Appendix  
 132 1, we notice that  $L_1^{sim}$  slightly increased the number of its members, group  $L_2^{sim}$  slightly decreased it, while group  
 133  $L_3^{sim}$  leaved it relatively unchanged.

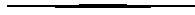

134 [1] Wilensky, U. (1999). NetLogo. <http://ccl.northwestern.edu/netlogo/>. Center for Connected Learning and Computer-Based  
 135 Modeling, Northwestern University, Evanston, IL.
